# Supplementary material for: Clinical Diagnosis of Chikungunya Infection: An Essential Aid in a Primary Care Setting Where Serological Confirmation Is Not Available
Source: MDPI journal article supplement (doi:10.3390/tropicalmed8040213), 2023-04-03
Supplement: s1 [file s1]

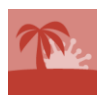

# Supplementary Materials of Clinical Diagnosis of Chikungunya Infection: An Essential Aid in a Primary Care Setting Where Serological Confirmation is not Available

**Table S1.** Percentage of most common symptoms in arboviral diseases.

|                  | DENV  | CHIKV | ZIKAV | Reference                          |
|------------------|-------|-------|-------|------------------------------------|
| Fever            | 93.89 | 92.66 | 69.51 | [10, 11, 20–29, 12, 30, 13–19]     |
| Headache         | 73.33 | 64.14 | 72.19 | [10, 11, 20–23, 25, 27–29, 12–19]  |
| Rash             | 37.00 | 47.03 | 74.03 | [10, 11, 20–23, 25–30, 12–19]      |
| G/I symptoms     | 49.09 | 37.46 | 28.88 | [10, 11, 20–23, 25–30, 12–19]      |
| Myalgia          | 73.43 | 61.48 | 65.54 | [10, 11, 21–29, 12–19]             |
| Fatigue          | 12.50 | 43.78 | 40.55 | [15, 16, 18, 22, 23, 27, 28]       |
| Arthralgia       | 63.79 | 87.14 | 61.55 | [10, 11, 20, 22, 23, 25–30, 12–19] |
| Arthritis/Oedema | 11.50 | 48.36 | 27.80 | [10, 13, 29, 18–23, 25, 27]        |
| Bleeding         | 8.93  | 4.81  | 4.03  | [10, 12, 14–17, 23, 28]            |
| Red eye          | 34.38 | 29.42 | 62.04 | [10, 13, 17–19, 21, 23, 29, 30]    |

DENV: Dengue virus; CHIKV: Chikungunya virus; ZIKAV: Zika virus.

**Table S2.** Statistical differences between symptoms and arboviral diseases.

|                  | DENV-CHIKV | DENV-ZIKAV | CHIKV-ZIKAV |
|------------------|------------|------------|-------------|
| Fever            |            | < 0.000    | < 0.000     |
| Headache         |            |            |             |
| Rash             |            | < 0.000    | < 0.000     |
| G/I symptoms     |            | 0.0057     |             |
| Myalgia          |            |            |             |
| Fatigue          | < 0.000    | < 0.000    |             |
| Arthralgia       | < 0.000    |            | < 0.000     |
| Arthritis/Oedema | < 0.000    | 0.003      | 0.005       |
| Bleeding         |            |            |             |
| Red eye          |            | < 0.000    | < 0.000     |

DENV: Dengue virus; CHIKV: Chikungunya virus; ZIKAV: Zika virus.

**Table S3.** Definitions of diagnostic criteria and screening tools.

|                                              | Definition                                                                                                                                                                                                                                                                               |
|----------------------------------------------|------------------------------------------------------------------------------------------------------------------------------------------------------------------------------------------------------------------------------------------------------------------------------------------|
| CHIKV WHO case definition (2015) [31]        | Acute clinical case: clinical criterion (fever $\geq 38.5$ °C and joint pain usually incapacitating usually accompanied by exanthema, myalgia, back pain, and headache) and epidemiological criterion: resident or visitor in areas with local transmission of CHIKV on the last 15 days |
| Sissoko CHIKV screening tool (2010) [11]     | Incapacitating polyarthralgia and fever of abrupt onset                                                                                                                                                                                                                                  |
| Thiberville CHIKV screening tool (2013) [26] | Clinical score: fever and arthralgia for less than 48 hours plus: arthralgia of at least 1 MCP, arthralgia of at least 1 wrist and myalgia (probable CHIKV if 3 are present; possible CHIKV if only 2 are present)                                                                       |
| Cleton CHIKV screening tool (2015) [40]      | Arthralgia combined with rash (both symptoms present are associated with positive test outcome for CHIKV)                                                                                                                                                                                |
| Macpherson CHIKV screening tool (2016) [12]  | Joint pain and any combination of fever, body pain, or rash (the combination of symptoms that most closely agree with positive CHIKV serology)                                                                                                                                           |
| ZIKAV WHO case definition (2016) [41]        | Suspected case: a person presenting with rash and/or fever and at least one of the following signs or symptoms: arthralgia or arthritis or conjunctivitis (non-purulent/hyperaemic)                                                                                                      |
| Braga ZIKAV screening tool (2017) [17]       | Clinical based score to discriminate ZIKAV cases from other febrile or exanthematic illnesses (a score $\geq 7.5$ from maculopapular rash = 7, temperature $\leq 37.5$ °C = 6, itching = 4.5, anorexia = 2.5, no petechiae = 2, conjunctival hyperaemia = 1)                             |

|                                      |                                                                                                                                                                                                                                                                                                      |
|--------------------------------------|------------------------------------------------------------------------------------------------------------------------------------------------------------------------------------------------------------------------------------------------------------------------------------------------------|
| DENV WHO case definition (2009) [42] | Probable dengue: live in/travel to dengue endemic area. Fever and 2 of the following criteria: nausea or vomiting, rash, aches and pains, tourniquet test positive, leukopenia, any warning sign<br>CHIKV: Chikungunya virus; WHO: World Health Organization; ZIKAV: Zika virus; DENV: Dengue virus. |
|--------------------------------------|------------------------------------------------------------------------------------------------------------------------------------------------------------------------------------------------------------------------------------------------------------------------------------------------------|

## References

- Kularatne, S.A.M.; Gihan, M.C.; Weerasinghe, S.C.; Gunasena, S. Concurrent outbreaks of Chikungunya and Dengue fever in Kandy, Sri Lanka, 2006-07: A comparative analysis of clinical and laboratory features. *Postgrad. Med. J.* **2009**, *85*, 342–346.
- Sissoko, D.; Ezzedine, K.; Moendandzé, A.; Giry, C.; Renault, P.; Malvy, D. Field evaluation of clinical features during chikungunya outbreak in Mayotte, 2005-2006. *Trop. Med. Int. Heal.* **2010**, *15*, 600–607.
- Macpherson, C.; Noël, T.; Fields, P.; Jungkind, D.; Yearwood, K.; Simmons, M.; Widjaja, S.; Mitchell, G.; Noel, D.; Bidaisee, S.; et al. Clinical and serological insights from the asian lineage Chikungunya outbreak in Grenada, 2014: An observational study. *Am. J. Trop. Med. Hyg.* **2016**, *95*, 890–893.
- Bloch, D.; Roth, N.M.; Caraballo, E. V.; Muñoz-Jordan, J.; Hunsperger, E.; Rivera, A.; Pérez-Padilla, J.; Rivera Garcia, B.; Sharp, T.M. Use of Household Cluster Investigations to Identify Factors Associated with Chikungunya Virus Infection and Frequency of Case Reporting in Puerto Rico. *PLoS Negl. Trop. Dis.* **2016**, *10*, e0005075.
- van Genderen, F.T.; Krishnadath, I.; Sno, R.; Grunberg, M.G.; Zijlmans, W.; Adhin, M.R. First Chikungunya Outbreak in Suriname; Clinical and Epidemiological Features. *PLoS Negl. Trop. Dis.* **2016**, *10*, 1–18.
- Anaya, J.-M.; Rodríguez, Y.; Monsalve, D.M.; Vega, D.; Ojeda, E.; González-Bravo, D.; Rodríguez-Jiménez, M.; Pinto-Díaz, C.A.; Chaparro, P.; Gunturiz, M.L.; et al. A comprehensive analysis and immunobiology of autoimmune neurological syndromes during the Zika virus outbreak in Cúcuta, Colombia. *J. Autoimmun.* **2017**, *77*, 123–138.
- Godaert, L.; Bartholet, S.; Najioullah, F.; Hentzien, M.; Fanon, J.L.; Césaire, R.; Dramé, M. Screening for Chikungunya virus infection in aged people: Development and internal validation of a new score. *PLoS One* **2017**, *12*, 1–9.
- Braga, J.U.; Bressan, C.; Dalvi, A.P.R.; Calvet, G.A.; Dumas, R.P.; Rodrigues, N.; Wakimoto, M.; Nogueira, R.M.R.; Nielsen-Saines, K.; Brito, C.; et al. Accuracy of Zika virus disease case definition during simultaneous Dengue and Chikungunya epidemics. *PLoS One* **2017**, *12*, e0179725.
- O Silva, M.M.; Tauro, L.B.; Kikuti, M.; Anjos, R.O.; Santos, V.C.; Gonçalves, T.S.F.; Paploski, I.A.D.; Moreira, P.S.S.; Nascimento, L.C.J.; Campos, G.S.; et al. Concomitant transmission of dengue, chikungunya and Zika viruses in Brazil: Clinical and epidemiological findings from surveillance for acute febrile illness. *Clin. Infect. Dis.* **2018**, *8*.
- Carabali, M.; Lim, J.K.; Palencia, D.C.; Lozano-Parra, A.; Gelvez, R.M.; Lee, K.S.; Florez, J.P.; Herrera, V.M.; Kaufman, J.S.; Rojas, E.M.; et al. Burden of dengue among febrile patients at the time of chikungunya introduction in Piedecuesta, Colombia. *Trop. Med. Int. Heal.* **2018**, *23*, 1231–1241.
- Sánchez-Carbonel, J.; Tantaléan-Yépez, D.; Aguilar-Luis, M.A.; Silva-Caso, W.; Weilg, P.; Vásquez-Achaya, F.; Costa, L.; Martins-Luna, J.; Sandoval, I.; del Valle-Mendoza, J. Identification of infection by Chikungunya, Zika, and Dengue in an area of the Peruvian coast. Molecular diagnosis and clinical characteristics. *BMC Res. Notes* **2018**, *11*, 175.
- Azeredo, E.L.; Hoscher Romanholi, I.; Badolato-Corrêa, J.; Cunha, R.; Barbosa, L.S.; de-Oliveira-Pinto, L.M.; Dal Fabbro, M.; dos Santos, F.B.; Sánchez-Arcila, J.C.; Nunes, P.C.G.; et al. Clinical and Laboratory Profile of Zika and Dengue Infected Patients: Lessons Learned From the Co-circulation of Dengue, Zika and Chikungunya in Brazil. *PLoS Curr.* **2018**.
- Lee, V.J.; Chow, A.; Zheng, X.; Carrasco, L.R.; Cook, A.R.; Lye, D.C.; Ng, L.C.; Leo, Y.S. Simple Clinical and Laboratory Predictors of Chikungunya versus Dengue Infections in Adults. *PLoS Negl. Trop. Dis.* **2012**, *6*.
- Vega, F.L.R.; Bezerra, J.M.T.; Said, R.F. de C.; Gama Neto, A.N. da; Cotrim, E.C.; Mendez, D.; Amâncio, F.F.; Carneiro,

- M. Emergence of chikungunya and Zika in a municipality endemic to dengue, Santa Luzia, MG, Brazil, 2015–2017. *Rev. Soc. Bras. Med. Trop.* **2019**, *52*, 1–9.
24. Taraphdar, D.; Sarkar, A.; Mukhopadhyay, B.B.; Chatterjee, S. A Comparative Study of Clinical Features between Monotypic and Dual Infection Cases with Chikungunya Virus and Dengue Virus in West Bengal, India. *Am. J. Trop. Med. Hyg.* **2012**, *86*, 720–723.
  25. Mohd Zim, M.A.; Sam, I.-C.; Omar, S.F.S.; Chan, Y.F.; AbuBakar, S.; Kamarulzaman, A. Chikungunya infection in Malaysia: Comparison with dengue infection in adults and predictors of persistent arthralgia. *J. Clin. Virol.* **2013**, *56*, 141–145.
  26. Thiberville, S.D.; Boisson, V.; Gaudart, J.; Simon, F.; Flahault, A.; de Lamballerie, X. Chikungunya Fever: A Clinical and Virological Investigation of Outpatients on Reunion Island, South-West Indian Ocean. *PLoS Negl. Trop. Dis.* **2013**, *7*.
  27. Sahadeo, N.; Mohammed, H.; Allicock, O.M.; Auguste, A.J.; Widen, S.G.; Badal, K.; Pulchan, K.; Foster, J.E.; Weaver, S.C.; Carrington, C.V.F. Molecular Characterisation of Chikungunya Virus Infections in Trinidad and Comparison of Clinical and Laboratory Features with Dengue and Other Acute Febrile Cases. *PLoS Negl. Trop. Dis.* **2015**, *9*, 1–18.
  28. Waggoner, J.J.; Gresh, L.; Vargas, M.J.; Ballesteros, G.; Tellez, Y.; Soda, K.J.; Sahoo, M.K.; Nuñez, A.; Balmaseda, A.; Harris, E.; et al. Viremia and Clinical Presentation in Nicaraguan Patients Infected With Zika Virus, Chikungunya Virus, and Dengue Virus. *Clin. Infect. Dis.* **2016**, *63*, 1584–1590.
  29. Romero, C.; Zogbi, H.; Carvalho, M.S.; de Souza, R.V.; Calvet, G.A.; Brasil, P.; de Filippis, A.M.B.; Bressan, C. da S.; Mendonça, M.C.L. de; Alves, S.S.; et al. Zika Virus Outbreak in Rio de Janeiro, Brazil: Clinical Characterization, Epidemiological and Virological Aspects. *PLoS Negl. Trop. Dis.* **2016**, *10*, e0004636.
  30. Danis-Lozano, R.; Díaz-González, E.E.; Trujillo-Murillo, K. del C.; Caballero-Sosa, S.; Sepúlveda-Delgado, J.; Malo-García, I.R.; Canseco-Ávila, L.M.; Salgado-Corsantes, L.M.; Domínguez-Arrebillaga, S.; Torres-Zapata, R.; et al. Clinical characterization of acute and convalescent illness of confirmed chikungunya cases from Chiapas, S. Mexico: A cross sectional study. *PLoS One* **2017**, *12*, 1–15.
  31. World Health Organization (WHO) Chikungunya: case definitions for acute, atypical and chronic cases. Conclusions of an expert consultation, Managua, Nicaragua, 20–21 May 2015. *Relev. Epidemiol. Hebd.* **2015**, *90*, 410–4.
  40. Cleton, N.B.; Reusken, C.B.E.M.; Wagenaar, J.F.P.; van der Vaart, E.E.; Reimerink, J.; van der Eijk, A.A.; Koopmans, M.P.G. Syndromic Approach to Arboviral Diagnostics for Global Travelers as a Basis for Infectious Disease Surveillance. *PLoS Negl. Trop. Dis.* **2015**, *9*, 1–15.
  41. OMS Zika virus disease: Interim case definitions. *Who/Zikv/Sur/16.1* **2016**, 2016.
  42. Organization, W.H. *Dengue: Guidelines for Diagnosis Treatment Prevention and Control (New Edition 2009)*; World Health Organization, 2009; ISBN 978 92 4 154787 1.

**Disclaimer/Publisher’s Note:** The statements, opinions and data contained in all publications are solely those of the individual author(s) and contributor(s) and not of MDPI and/or the editor(s). MDPI and/or the editor(s) disclaim responsibility for any injury to people or property resulting from any ideas, methods, instructions or products referred to in the content.
